# Supplementary material
Source: Royal Society of Chemistry journal article supplement (doi:10.1039/d5gc06956d)
Supplement: d5gc06956d1.pdf [file d5gc06956d1.pdf]

## **Thermodynamically Stabilized and Driven Synthesis of Multicomponent High-Entropy Alloy Catalysts for HER**

Mengxin Chen,<sup>a</sup> Yuji Gao,<sup>a</sup> Shuai Wang,<sup>a</sup> Furong Tao,<sup>a</sup> Jingui Wang,<sup>a</sup> Liwei Niu,<sup>a</sup>

Hao Fang,<sup>a</sup> Chao Wang,<sup>b</sup> Guangqiang Lv<sup>a\*</sup>

<sup>a</sup> School of Chemistry and Chemical Engineering, Qilu University of Technology

(Shandong Academy of Sciences), Jinan 250353, Shandong, China. E-mail:

lvguangqiang@qlu.edu.cn;

<sup>b</sup> State Key Laboratory of Biobased Material and Green Papermaking, Qilu University

of Technology, Jinan 250353, Shandong, China.

- 1. Materials**
- 2. Synthesis of catalyst**
- 3. Characterization**
- 4. Electrochemical measurements**
- 5. Figure S1. (a,b) TEM images of HEA-5, (c) particle-size distribution histogram of HEA-5, and (d) corresponding elemental mapping images of HEA-5**
- 6. Figure S2. (a,b) TEM images of HEA-6, (c) particle-size distribution histogram of HEA-6, and (d) corresponding elemental mapping images of HEA-6**
- 7. Figure S3. (a,b) TEM images of HEA-7, (c) particle-size distribution histogram of HEA-7, and (d) corresponding elemental mapping images of HEA-7**
- 8. Figure S4. (a,b) TEM images of HEA-8, (c) particle-size distribution histogram of HEA-8, and (d) corresponding elemental mapping images of HEA-8**
- 9. Figure S5. Particle-size distribution histogram of HEA-9**
- 10. Figure S6. Particle-size distribution histogram of HEA-15**
- 11. Figure S7. Survey XPS spectra of HEA-5, HEA-6, HEA-7, HEA-8, and HEA-9**
- 12. Figure S8. XRD patterns of HEA-5 calcined at different holding times**

- 13. Figure S9. XRD patterns of HEA-5 calcined at different calcination temperatures**
- 14. Figure S10. CV curves in the non-faradaic region at different scan rates**
- 15. Figure S11. Post-stability structural characterization of HEA-9 after the HER durability test.**
- 16. Figure S12. Post-stability XPS spectra of HEA-9 after the HER durability test**
- 17. Table S1. Mixing enthalpies of binary element pairs**
- 18. Table S2. Electronegativity and covalent radius of the involved metals**
- 19. Table S3. Charge-transfer resistance ( $R_{ct}$ ) values of different samples**

## Material and methods

### 1. Materials

Chloroplatinic acid hexahydrate ( $\text{H}_2\text{PtCl}_6 \cdot 6\text{H}_2\text{O}$ , AR Pt  $\geq$  37.5%), molybdenum pentachloride ( $\text{MoCl}_5$ , 99.5%), palladium chloride ( $\text{PdCl}_2$ , 99.99%), zinc chloride ( $\text{ZnCl}_2$ , 98%) rhodium trichloride ( $\text{RhCl}_3$ , 99%) and platinum on carbon catalyst (Pt, 10%) were purchased from Macklin Biochemical Co., Ltd. (Shanghai, China). Ferric chloride hexahydrate ( $\text{FeCl}_3 \cdot 6\text{H}_2\text{O}$ , 99%), cobalt chloride hexahydrate ( $\text{CoCl}_2 \cdot 6\text{H}_2\text{O}$ , 99%), aluminum trichloride ( $\text{AlCl}_3$ , AR,  $\geq$  99.0%) and potassium hydroxide (KOH, AR) were obtained from Sinopharm Chemical Reagent Co., Ltd. (Shanghai, China). Activated carbon powder (AR  $\geq$  200 mesh), nickel chloride hexahydrate ( $\text{NiCl}_2 \cdot 6\text{H}_2\text{O}$ , AR, 98%), gallium(III) chloride anhydrous ( $\text{GaCl}_3$ , 99.99% metals basis), and zirconium chloride ( $\text{ZrCl}_4$ ) and manganese chloride tetrahydrate ( $\text{MnCl}_2 \cdot 4\text{H}_2\text{O}$ , 99.99%) were purchased from Aladdin Biochemical Technology Co., Ltd. (Shanghai, China). Copper chloride dihydrate ( $\text{CuCl}_2 \cdot 2\text{H}_2\text{O}$ , 99.0%) was purchased from Shanghai Zhenxin Reagent Factory (Shanghai, China). Chromium chloride hexahydrate ( $\text{CrCl}_3 \cdot 6\text{H}_2\text{O}$ , AR, 99%) was obtained from Tianjin Damao Chemical Reagent Factory (Tianjin, China). Indium(III) chloride tetrahydrate ( $\text{InCl}_3 \cdot 4\text{H}_2\text{O}$ , 99.99% metals basis) was purchased from 3A.

Anhydrous ethanol ( $\text{CH}_3\text{CH}_2\text{OH}$ , 99.7%) was obtained from Tianjin Fuyu Fine Chemical Co., Ltd. (Tianjin, China). Nafion solution (5%) was purchased from DuPont Co. (USA).

## 2. Synthesis of catalyst

Taking the preparation of  $\text{Fe}_1\text{Co}_1\text{Ni}_{0.5}\text{Cu}_{0.5}\text{Pt}_1\text{Pd}_{0.5}\text{Cr}_{0.5}\text{Mo}_{0.5}\text{Mn}_{0.5}\text{@C}$  as an example, 200  $\mu\text{l}$  of HCl was dissolved in 10 ml of deionized water in a 25 ml beaker and ultrasonicated for 5 min. Subsequently,  $\text{FeCl}_3 \cdot 6\text{H}_2\text{O}$  (4.03 mg),  $\text{CoCl}_2 \cdot 6\text{H}_2\text{O}$  (3.55 mg),  $\text{NiCl}_2 \cdot 6\text{H}_2\text{O}$  (1.77 mg),  $\text{CuCl}_2 \cdot 2\text{H}_2\text{O}$  (1.27 mg),  $\text{H}_2\text{PtCl}_6 \cdot 6\text{H}_2\text{O}$  (7.72 mg),  $\text{PdCl}_2$  (1.32 mg),  $\text{CrCl}_3 \cdot 6\text{H}_2\text{O}$  (1.99 mg),  $\text{MoCl}_5$  (2.04 mg), and  $\text{MnCl}_2 \cdot 4\text{H}_2\text{O}$  (1.48 mg) were added into the solution and ultrasonicated for 60 min. Activated carbon (100 mg) was then added, followed by another 60 min ultrasonication and 2 h magnetic stirring. The resulting suspension was centrifuged at 8000 rpm for 5 min, and the black precipitate was collected and washed three times with deionized water. The washed product was dried overnight at 50 ° C to obtain a dry black powder. The powder was subsequently annealed under an  $\text{Ar}/\text{H}_2$  atmosphere at a heating rate of 5 ° C/min to 700 ° C and maintained for 6 h, after which it was naturally cooled to room temperature to yield  $\text{Fe}_1\text{Co}_1\text{Ni}_{0.5}\text{Cu}_{0.5}\text{Pt}_1\text{Pd}_{0.5}\text{Cr}_{0.5}\text{Mo}_{0.5}\text{Mn}_{0.5}\text{@C}$ . The

synthesis of other HEA@C catalysts followed the same procedure, with only the corresponding metal salts substituted accordingly.

### **3. Characterization**

X-ray diffraction (XRD) patterns were collected on a Bruker diffractometer (Germany) with an operating voltage of 40 kV and a current of 40 mA, using a continuous scan rate of 10 °/min. The acquired diffraction data were processed with Jade 6.5 software, and phase identification was performed by matching the characteristic peaks with standard database references. X-ray photoelectron spectroscopy (XPS) was performed on a Thermo Scientific K-Alpha spectrometer equipped with a microfocused monochromatic Al K $\alpha$  source. Measurements were conducted at room temperature under ultra-high vacuum ( $10^{-7}$  mbar) with a pass energy of 30 eV to minimize charging effects. All binding energies were referenced to the C 1s peak at 284.8 eV, and spectral deconvolution was carried out using Avantage software (Thermo Scientific). The morphology and microstructure of the samples were examined using a FEI Talos F200x transmission electron microscope (TEM, USA), and elemental analysis was performed via energy-dispersive X-ray spectroscopy (EDS) on the same instrument. Lattice fringes were analyzed by Fourier transform processing with DigitalMicrograph software, while particle size distribution was determined using ImageJ software.

#### 4. Electrochemical measurements

2 mg of the catalyst was dispersed in a mixture of 100  $\mu\text{L}$  anhydrous ethanol, 100  $\mu\text{L}$  deionized water, and 4  $\mu\text{L}$  Nafion solution, followed by stirring for 1 h to achieve uniform dispersion. The resulting black ink was drop-cast onto a carbon paper substrate (1 cm  $\times$  1 cm) and dried in a forced-air oven at 40  $^{\circ}\text{C}$  for 4 h, yielding a catalyst electrode with an average mass loading of 2 mg/cm<sup>2</sup>.

Electrochemical measurements were carried out on a CHI 760E workstation at room temperature. The HER activity was evaluated in 1 M KOH electrolyte using a three-electrode system consisting of the prepared electrode as the working electrode, a Pt foil as the counter electrode, and a Hg/HgO electrode as the reference electrode. Linear sweep voltammetry (LSV) was performed at a scan rate of 10 mV/s with 95% iR compensation. All potentials were calibrated to the reversible hydrogen electrode (RHE) according to the Nernst equation:

$$E(\text{RHE}) = E(\text{Hg/HgO}) + 0.059 \times \text{pH} + 0.098 \text{ V}.$$

The Tafel slope was derived from the polarization curves. Catalyst durability was assessed by chronoamperometry in alkaline solution at a current density of 10 mA/cm<sup>2</sup> and 100 mA/cm<sup>2</sup>. Electrochemical impedance spectroscopy (EIS) measurements were performed in a conventional three-electrode configuration over the frequency range

of  $0.01-10^5$  Hz, at the potential corresponding to a current density of  $10 \text{ mA}\cdot\text{cm}^{-2}$ . The EIS spectra were fitted using an equivalent circuit model in Zview2, which comprised solution resistance ( $R_s$ ), a constant phase element (CPE), and charge-transfer resistance ( $R_{ct}$ ), in order to probe the kinetic characteristics of the system. Notably,  $R_{ct}$  reflects the charge-transfer resistance associated with the Faradaic HER and serves as a critical parameter for evaluating the catalytic kinetics. Cyclic voltammetry (CV) measurements were performed within the potential range of  $-0.03$  to  $-0.13$  V versus RHE at scan rates of 10, 20, 30, 40, and 50 mV/s. The double-layer capacitance ( $C_{dl}$ ) was calculated from the slope of  $C_{dl}=\Delta J/v$ , where  $\Delta J$  represents the difference between anodic and cathodic current densities, and  $v$  is the scan rate. The electrochemically active surface area (ECSA) was estimated using the empirical equation  $ECSA = C_{dl} / C_s$ .

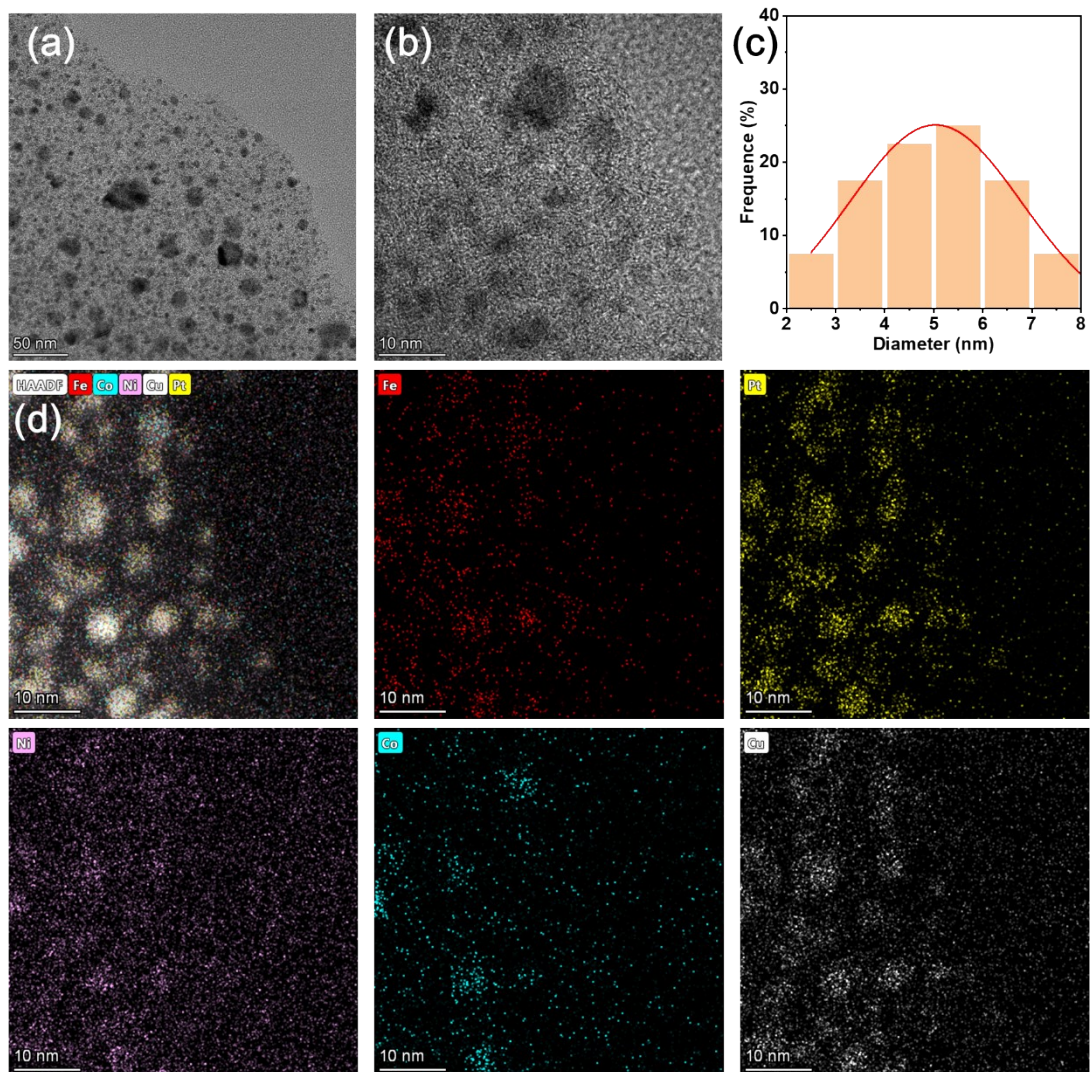

**Figure S1.** (a-b) TEM images of the HEA-5; (c) The particle size distribution diagram of HEA-5; (d) Mapping images of the HEA-5.

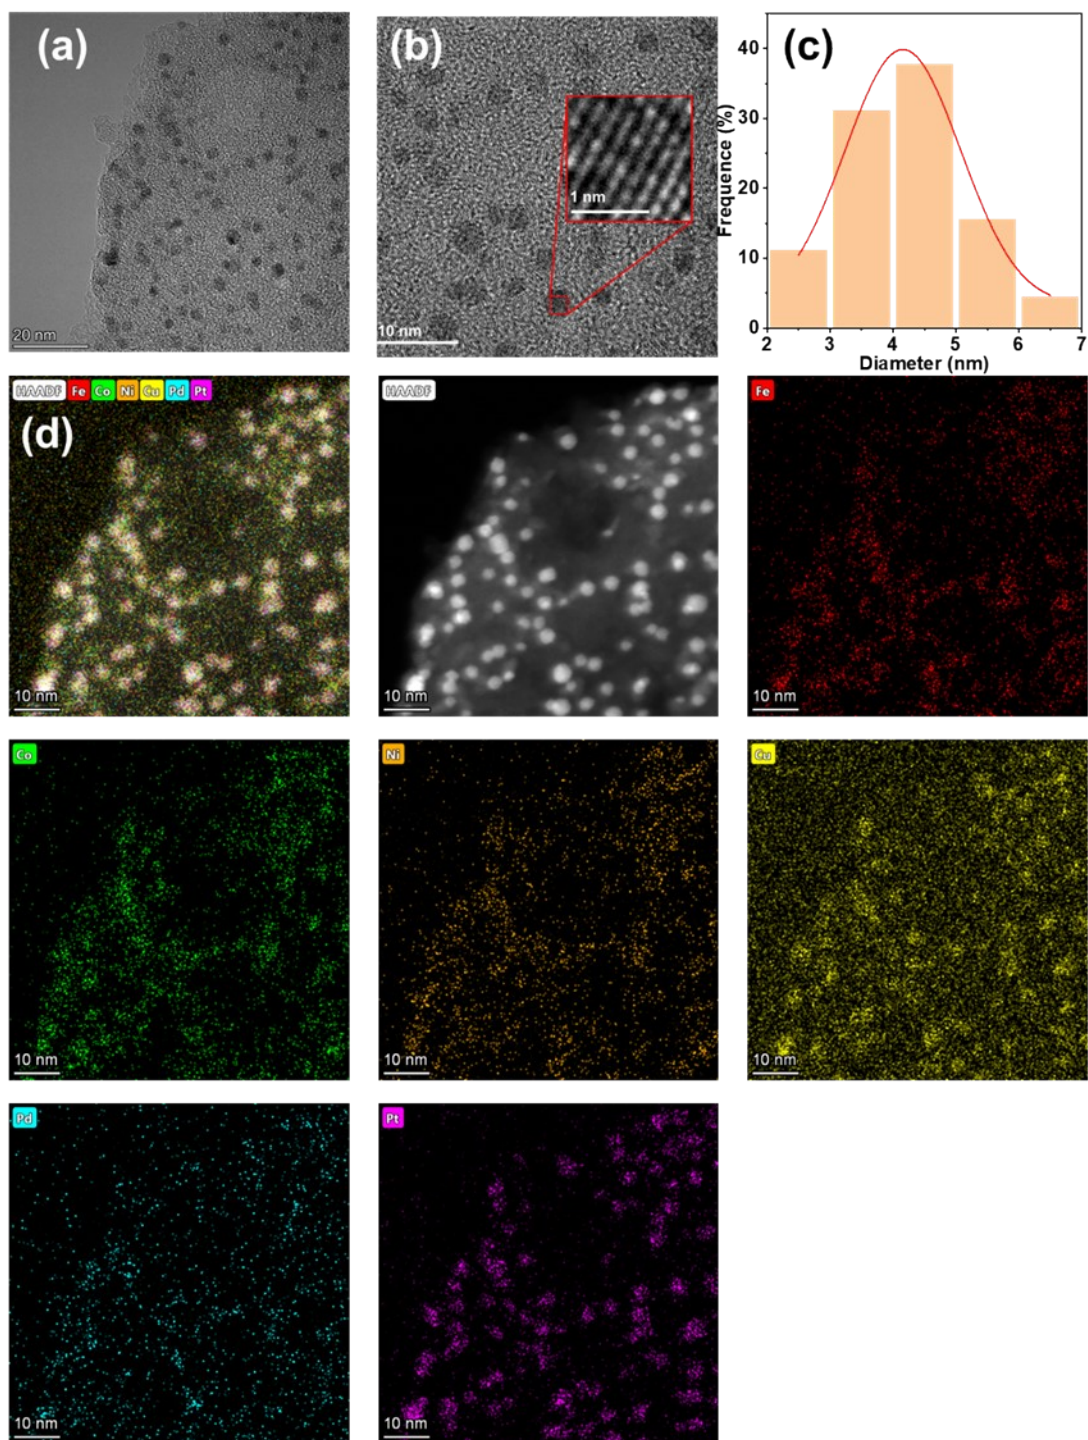

**Figure S2.** (a-b) TEM images of the HEA-6; (c) The particle size distribution diagram of HEA-6; (d) Mapping images of the HEA-6

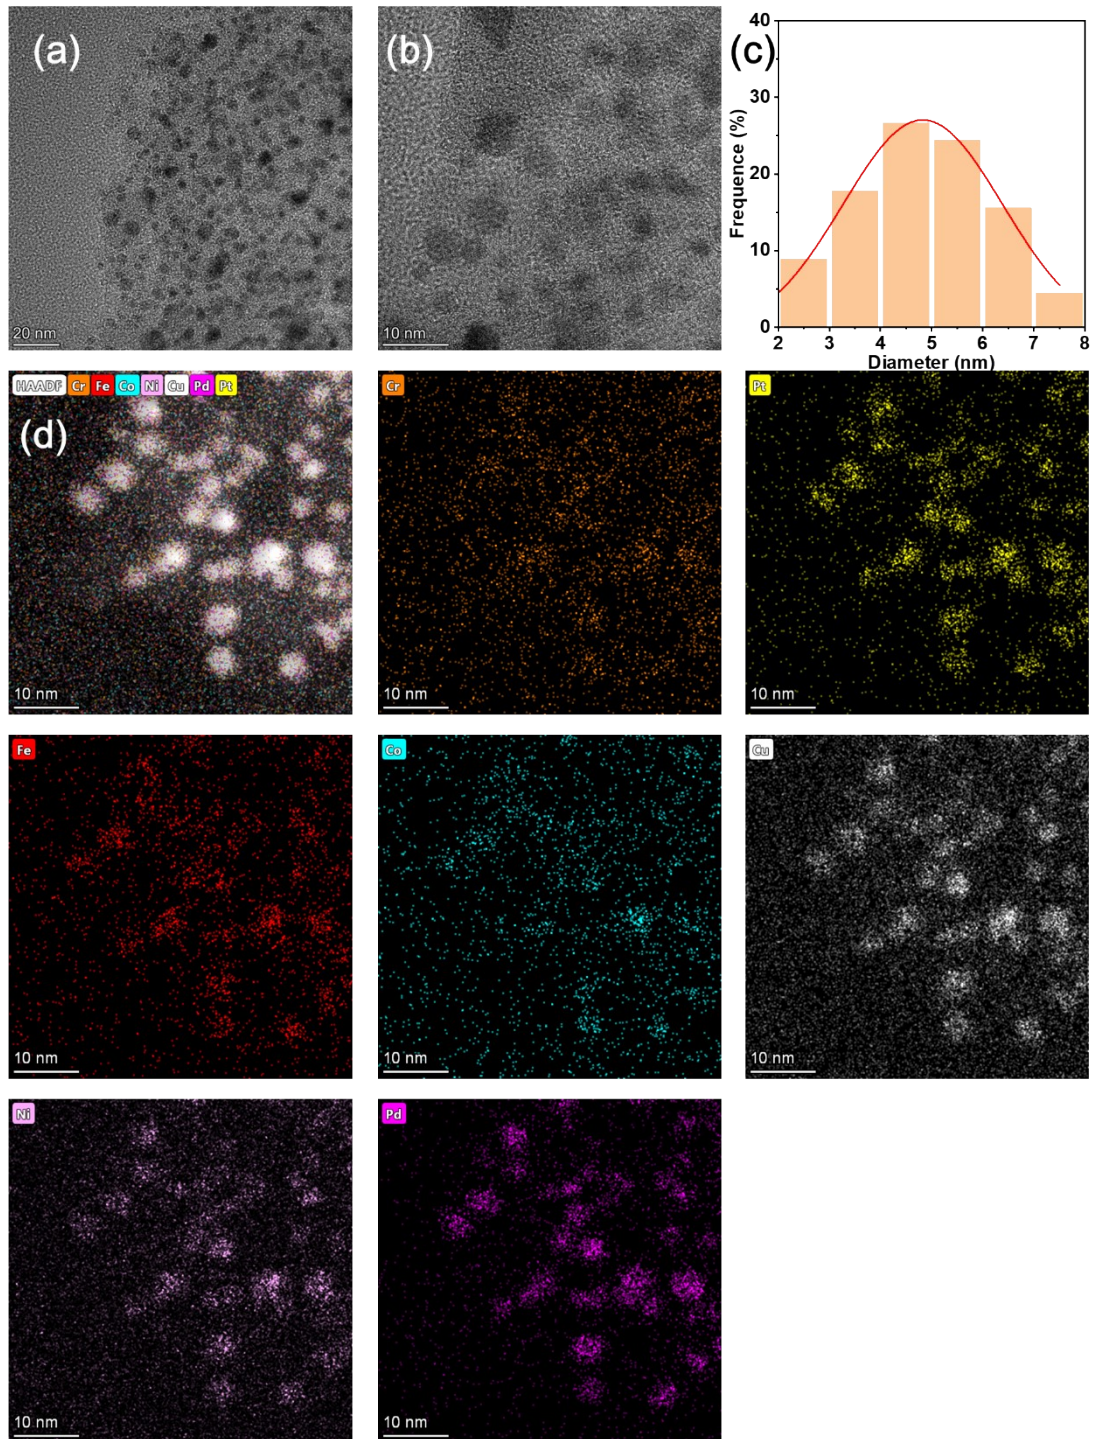

**Figure S3.** (a-b) TEM images of the HEA-7; (c) The particle size distribution diagram of HEA-7; (d) Mapping images of the HEA-7

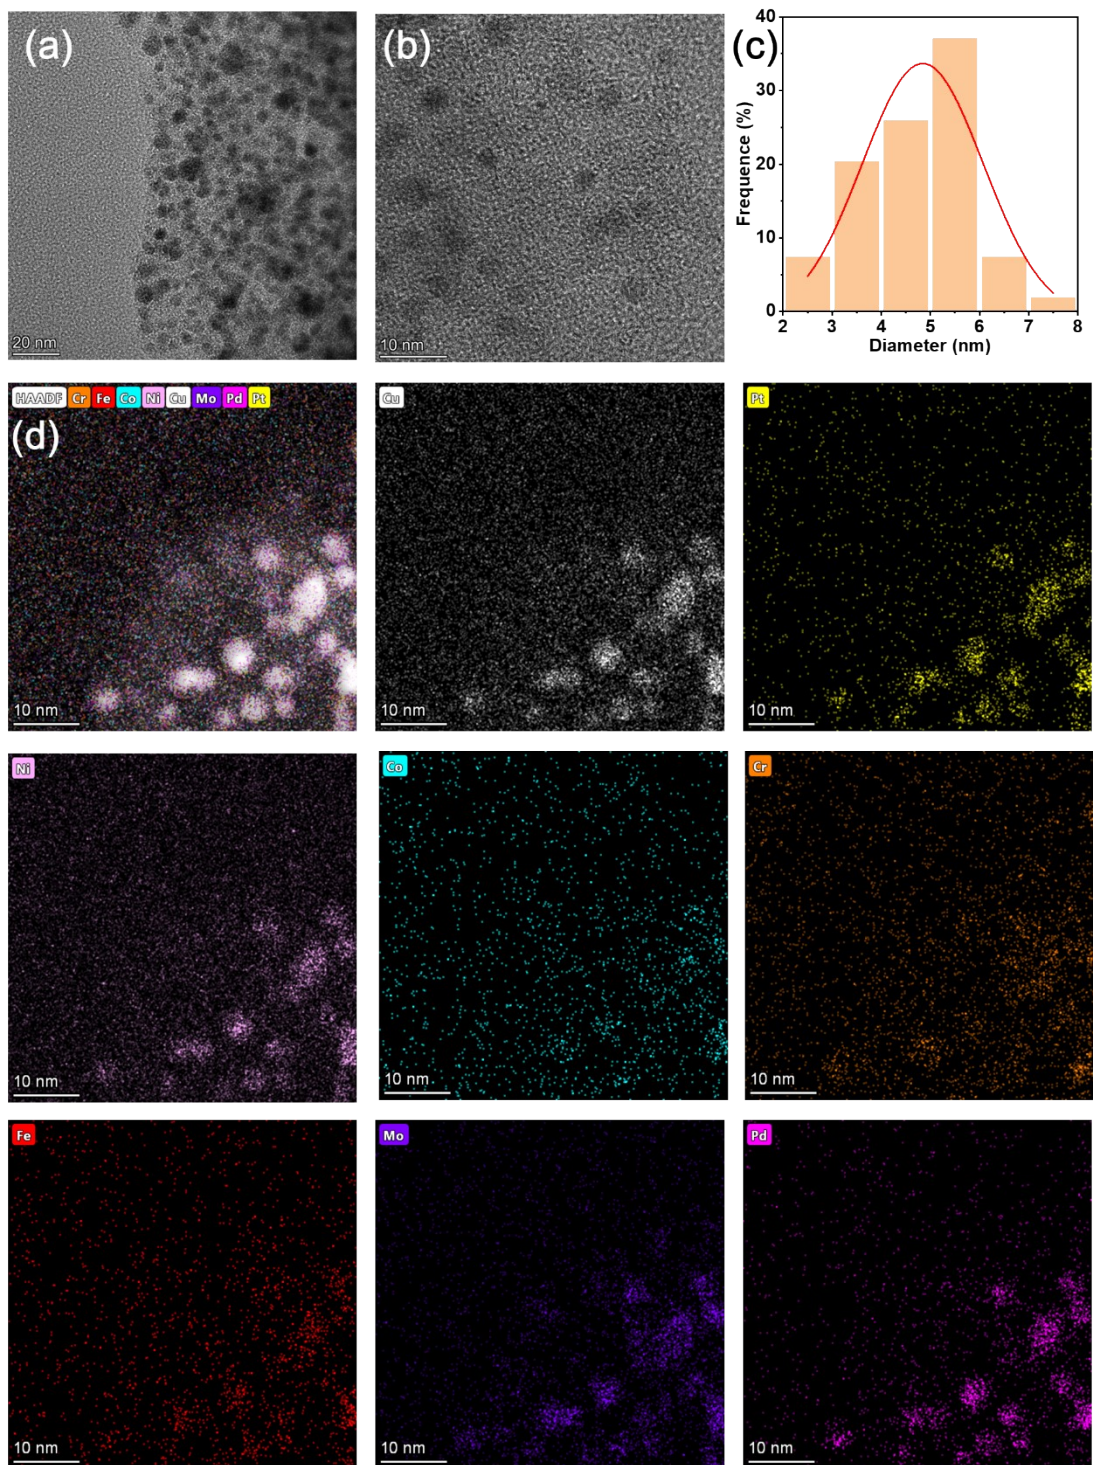

**Figure S4.** (a-b) TEM images of the HEA-8; (c) The particle size distribution diagram of HEA-8; (d) Mapping images of the HEA-8

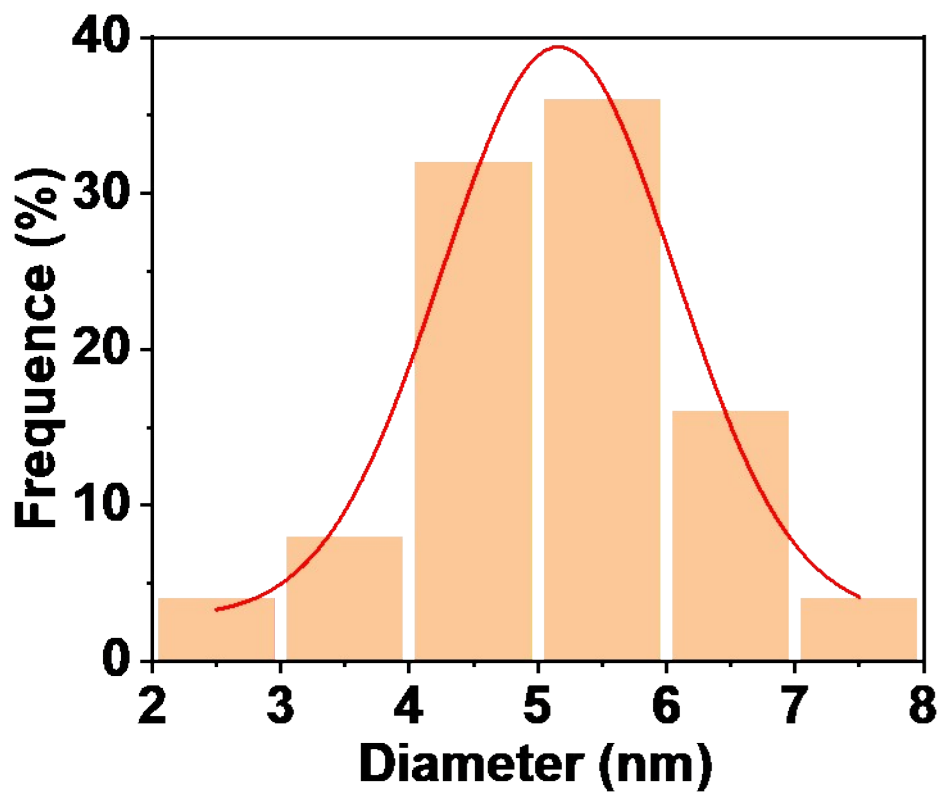

Figure S5. The particle size distribution diagram of HEA-9

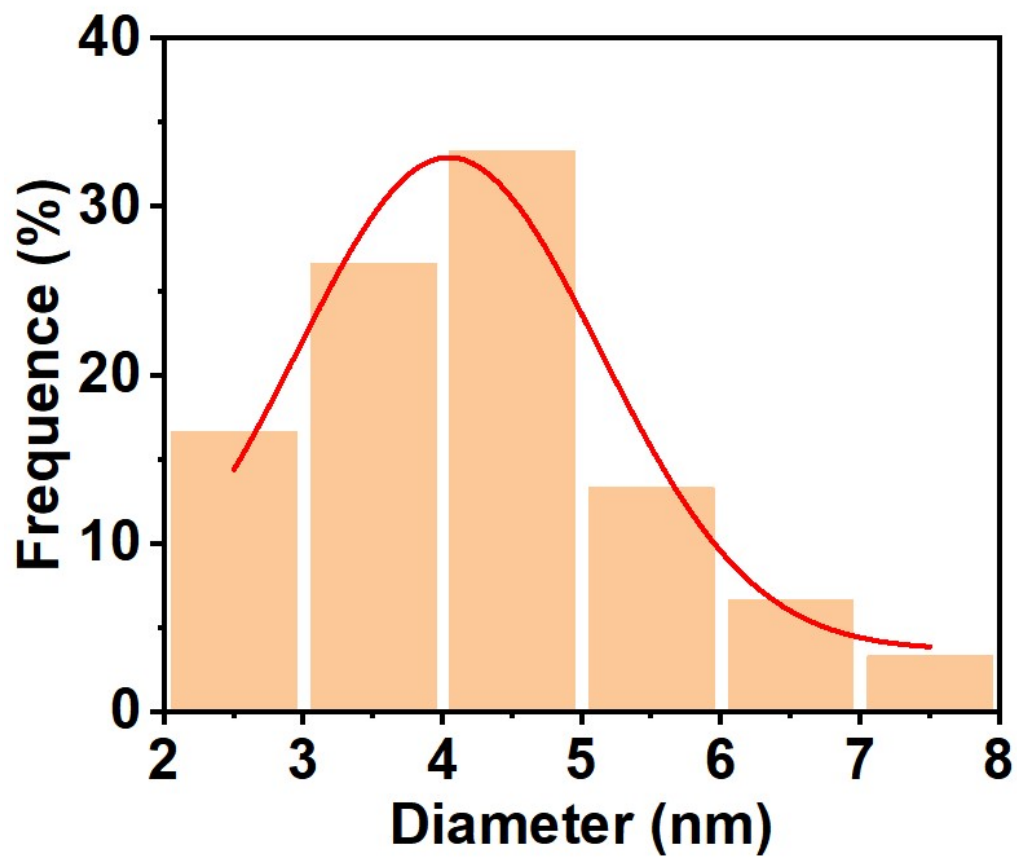

Figure S6. The particle size distribution diagram of HEA-15.

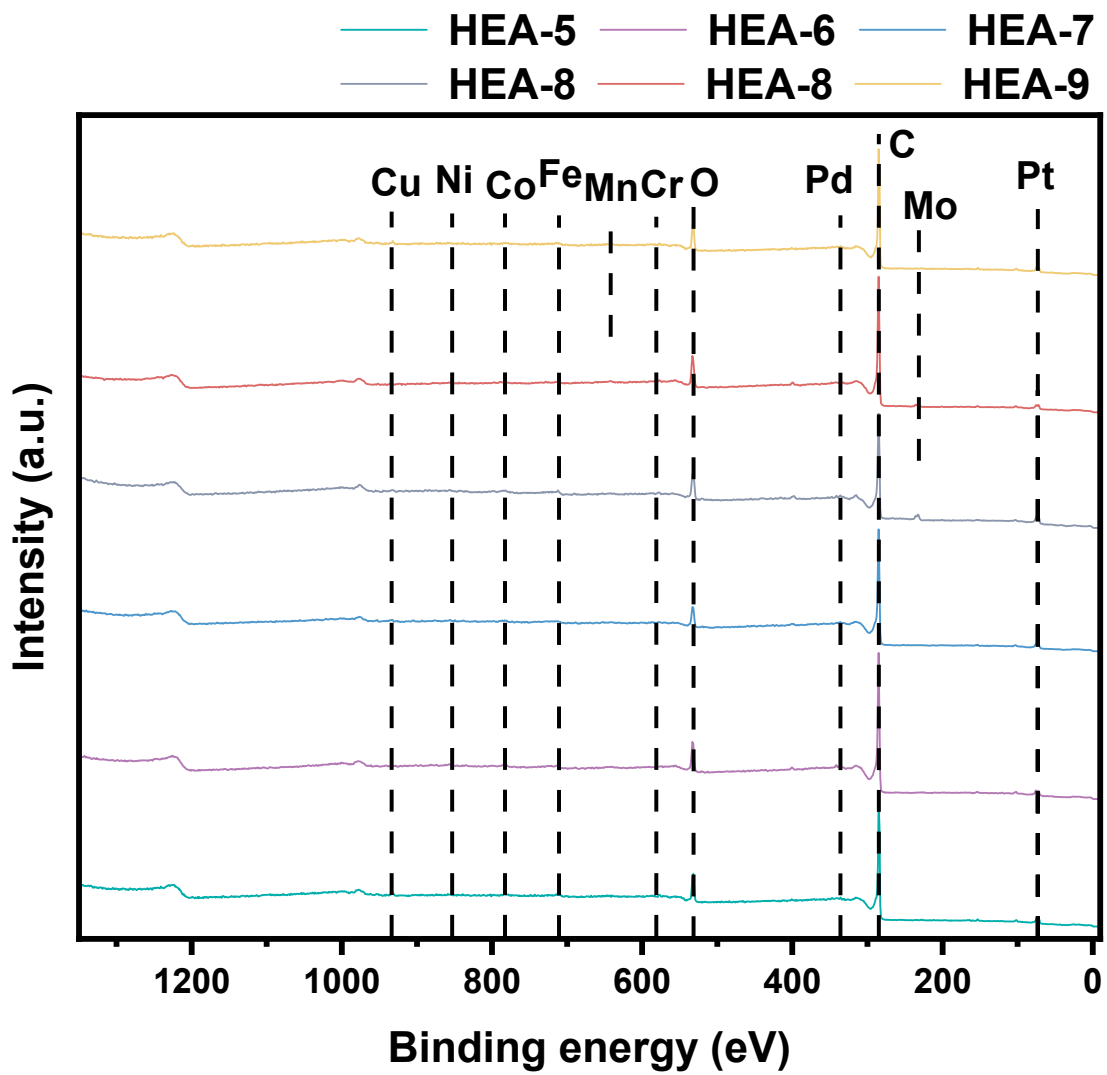

Figure S7. Survey XPS spectra of HEA-5, HEA-6, HEA-7, HEA-8 and HEA-9

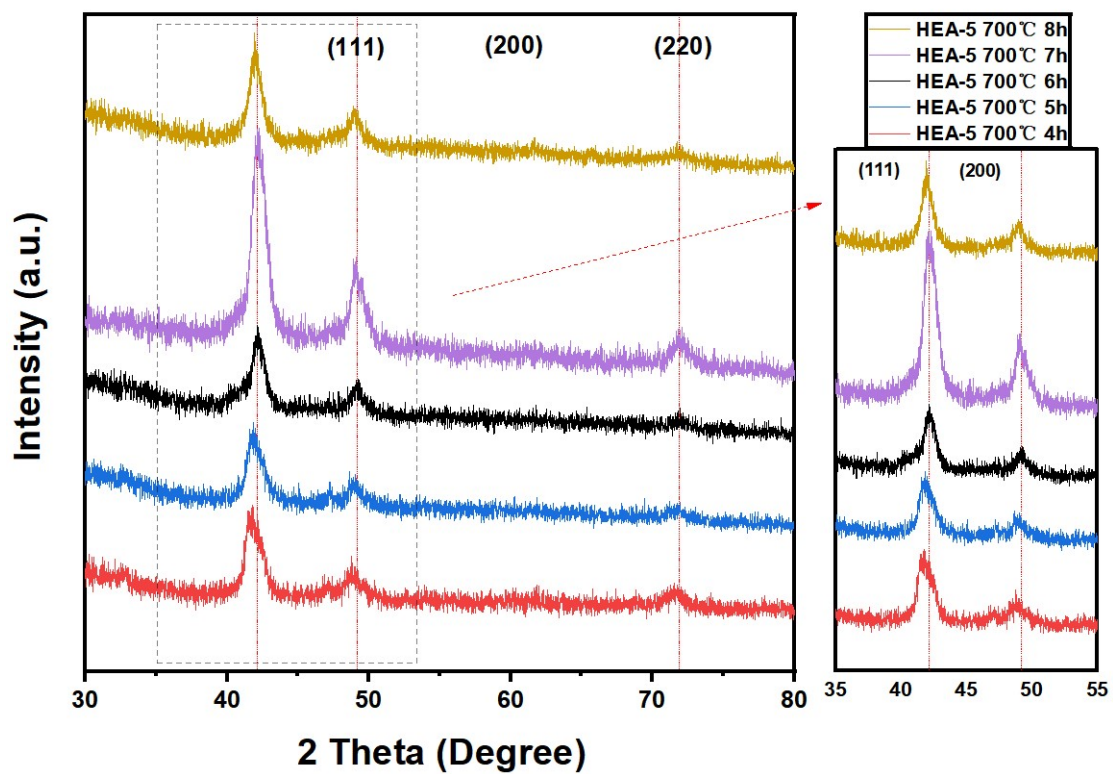

Figure S8. XRD of HEA-5 calcined at different holding times

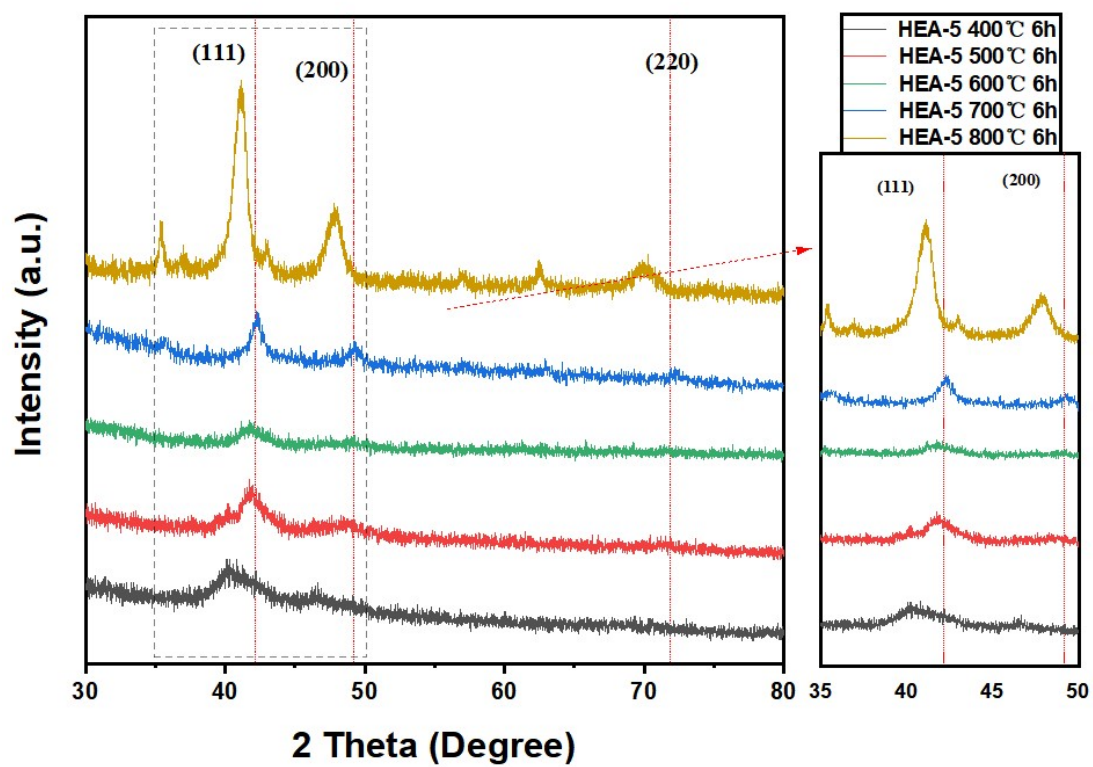

Figure S9. XRD of HEA-5 calcined at different temperatures

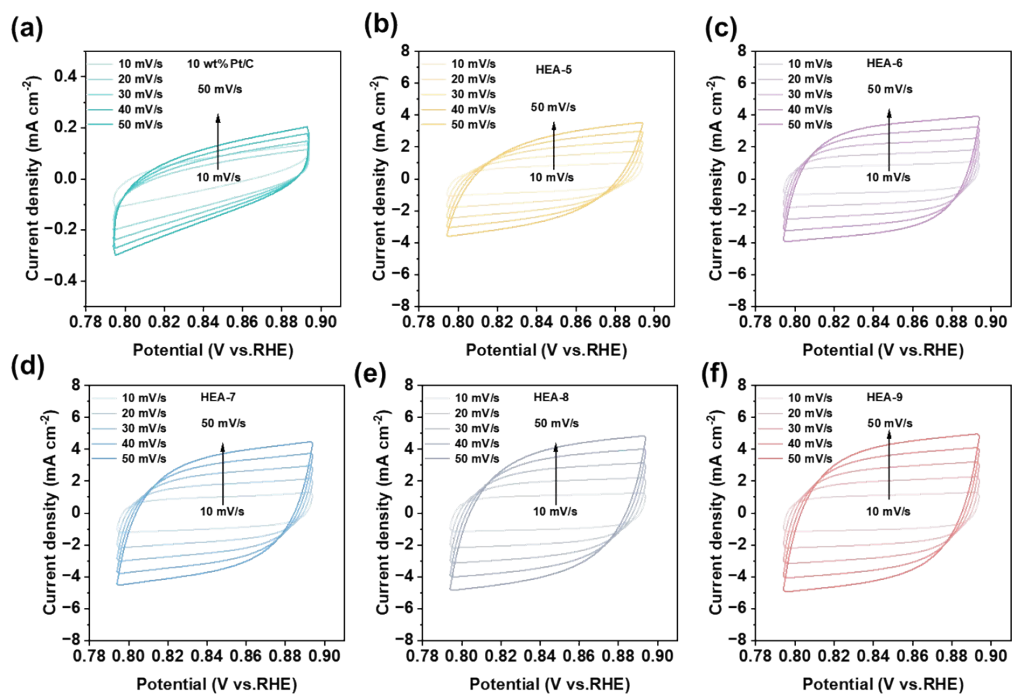

**Figure S10.** CV curves within a non-faradaic reaction region of -0.03 to -0.13 V (vs. RHE) at different scan rates toward HER for (a) 10 wt% Pt/C; (b) HEA-5; (c) HEA-6; (d) HEA-7; (e) HEA-8; (f) HEA-9.

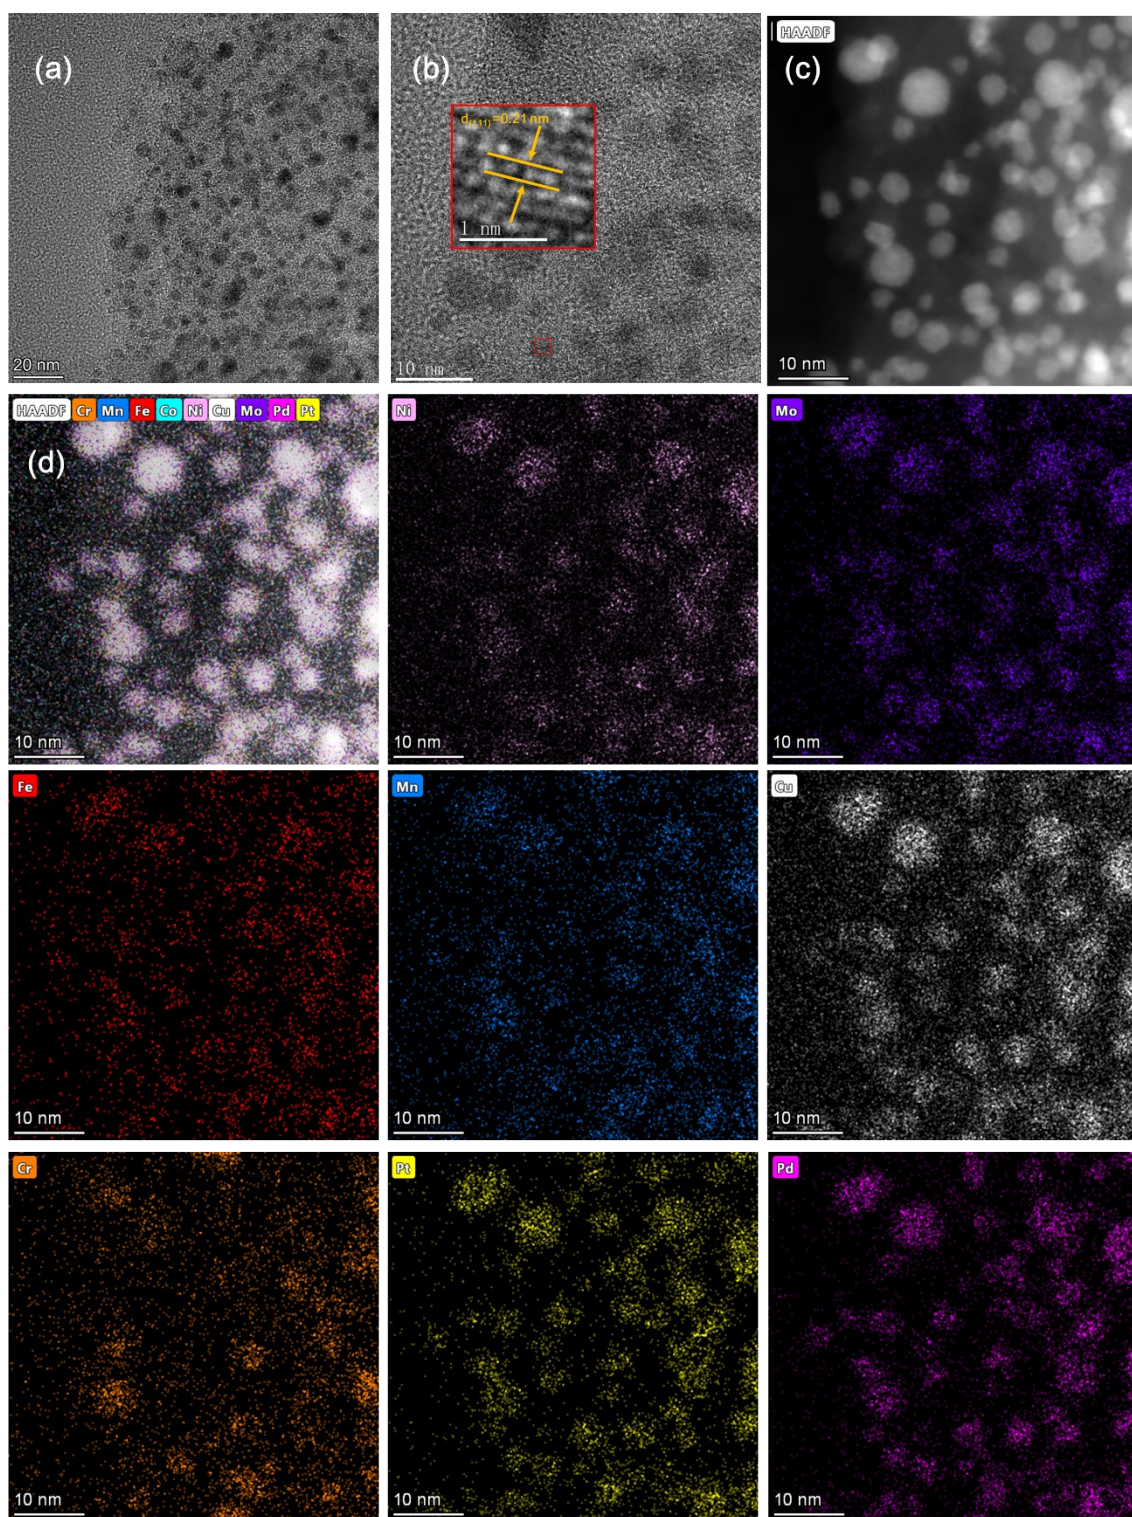

**Figure S11.** Post-stability structural characterization of HEA-9 after the HER durability test. (a-b) TEM images; (c) HAADF-STEM image; (d) corresponding EDS elemental mapping images of HEA-9 after the stability test.

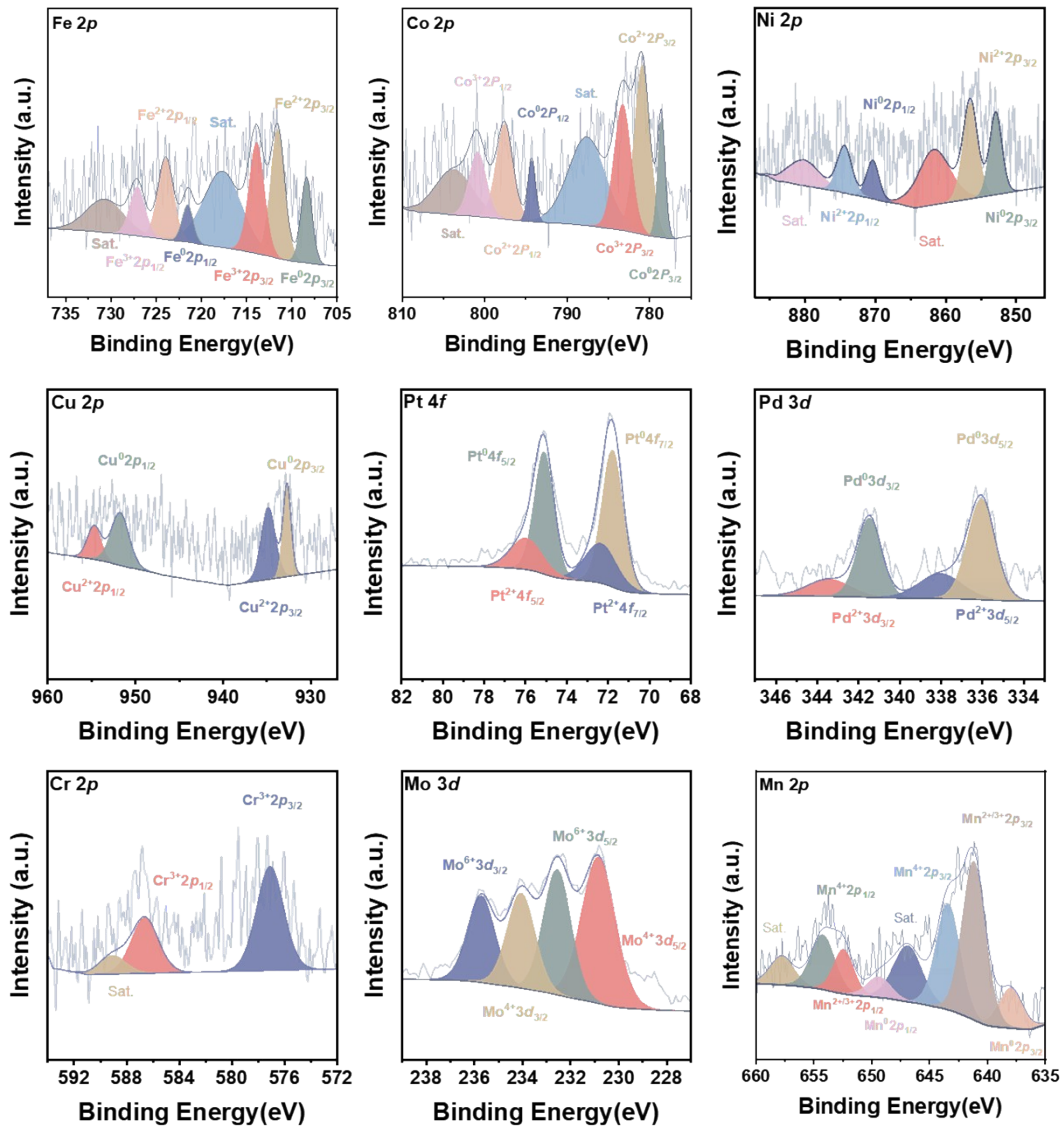

**Figure S12.** Post-stability XPS spectra of HEA-9 after the HER durability test, including Fe 2p, Co 2p, Ni 2p, Cu 2p, Pt 4f, Pd 3d, Cr 2p, Mo 3d, and Mn 2p core levels.

|           |          |    |    |     |     |     |    |    |    |
|-----------|----------|----|----|-----|-----|-----|----|----|----|
| <b>Fe</b> | <b>0</b> |    |    |     |     |     |    |    |    |
| <b>Co</b> | -1       | 0  |    |     |     |     |    |    |    |
| <b>Ni</b> | -2       | 0  | 0  |     |     |     |    |    |    |
| <b>Cu</b> | 13       | 6  | 4  | 0   |     |     |    |    |    |
| <b>Pt</b> | -13      | -7 | -5 | -12 | 0   |     |    |    |    |
| <b>Pd</b> | -4       | -1 | 0  | -14 | 2   | 0   |    |    |    |
| <b>Cr</b> | -1       | -4 | -7 | 12  | -24 | -15 | 0  |    |    |
| <b>Mn</b> | 0        | -5 | -8 | 4   | -28 | -23 | 2  | 0  |    |
| <b>Mo</b> | -2       | -5 | -7 | 19  | -28 | -15 | 0  | 5  | 0  |
|           | Fe       | Co | Ni | Cu  | Pt  | Pd  | Cr | Mn | Mo |

**Table S1 | The mixing enthalpies of two elements ( $\Delta H_{ij}^{mix}$ )**

**Table S2 | The electronegativity and covalent radius of the involved metals.**

| <b>Element</b> | <b>Electronegativity</b> | <b>Covalent Radius (pm)</b> |
|----------------|--------------------------|-----------------------------|
| <b>Mn</b>      | <b>1.55</b>              | <b>139</b>                  |
| <b>Mo</b>      | <b>2.16</b>              | <b>145</b>                  |
| <b>Fe</b>      | <b>1.83</b>              | <b>125</b>                  |
| <b>Co</b>      | <b>1.88</b>              | <b>126</b>                  |
| <b>Ni</b>      | <b>1.91</b>              | <b>121</b>                  |
| <b>Cu</b>      | <b>1.90</b>              | <b>138</b>                  |
| <b>Pt</b>      | <b>2.28</b>              | <b>128</b>                  |
| <b>Pd</b>      | <b>2.20</b>              | <b>131</b>                  |
| <b>Cr</b>      | <b>1.66</b>              | <b>127</b>                  |

**Note: An online tool was used: <https://ptable.com/?lang=en#Properties/Series>**

**Table S3** | The charge transfer resistance ( $R_{ct}$ ) of different samples

| <b>Catalyst.</b>   | <b><math>R_{ct}</math>(ohm)</b> |
|--------------------|---------------------------------|
| <b>HEA-5</b>       | 13.80                           |
| <b>HEA-6</b>       | 12.41                           |
| <b>HEA-7</b>       | 10.94                           |
| <b>HEA-8</b>       | 6.13                            |
| <b>HEA-9</b>       | 5.26                            |
| <b>10 wt% Pt/C</b> | 14.93                           |
